# Supplementary material for: Structural composition of antibacterial zinc-doped geopolymers
Source: Royal Society of Chemistry journal article supplement (doi:10.1039/d3dt01235b), 2023-01-01
Supplement: d3dt01235b1.pdf [file d3dt01235b1.pdf]

*Supplementary Materials for*

**Structural composition of antibacterial  
zinc-doped geopolymers**

Xiaojuan Kang, and Hailong Ye\*

Department of Civil Engineering, The University of Hong Kong, Pokfulam, Hong Kong, China

\*Corresponding author, Email: [hlye@hku.hk](mailto:hlye@hku.hk)

**This file includes:**

Figures S1 to S7

Tables S1 to S7

## Materials

MK precursor is largely amorphous with a small amount of anatase and quartz, and the MK particles have an intermediate particle size ( $D_{50}$ ) of  $\sim 10.9 \mu\text{m}$ , with an empirical formula of  $2\text{SiO}_2 \cdot \text{Al}_2\text{O}_3$  (Si/Al molar ratio=1.0). Nano zinc oxide (NanoTek, Alfa Aesar) is a powder with a particle size of 40-100 nm and a surface area of 10-25  $\text{m}^2/\text{g}$ . All chemicals in this experiment are analytically pure with the details as follows: sodium hydroxide powder (Uni-Chem, 99% purity, NaOH), sodium silicate solution (Uni-Chem) with the detailed composition as shown in Table S2, zinc nitrate (DUKSAN, extra pure).

Table S1 Oxide composition of unreacted MK precursor determined by XRF.

| Sample | SiO <sub>2</sub> | Al <sub>2</sub> O <sub>3</sub> | TiO <sub>2</sub> | P <sub>2</sub> O <sub>5</sub> | Na <sub>2</sub> O | Fe <sub>2</sub> O <sub>3</sub> | MgO   | CaO   | K <sub>2</sub> O | LOI  |
|--------|------------------|--------------------------------|------------------|-------------------------------|-------------------|--------------------------------|-------|-------|------------------|------|
| GGBS   | 52.57            | 44.38                          | 0.822            | 0.692                         | 0.487             | 0.420                          | 0.193 | 0.145 | 0.106            | 0.46 |

Note: LOI refers to the loss on ignition, as measured at 950 °C for 1 h by a thermogravimetric analyser.

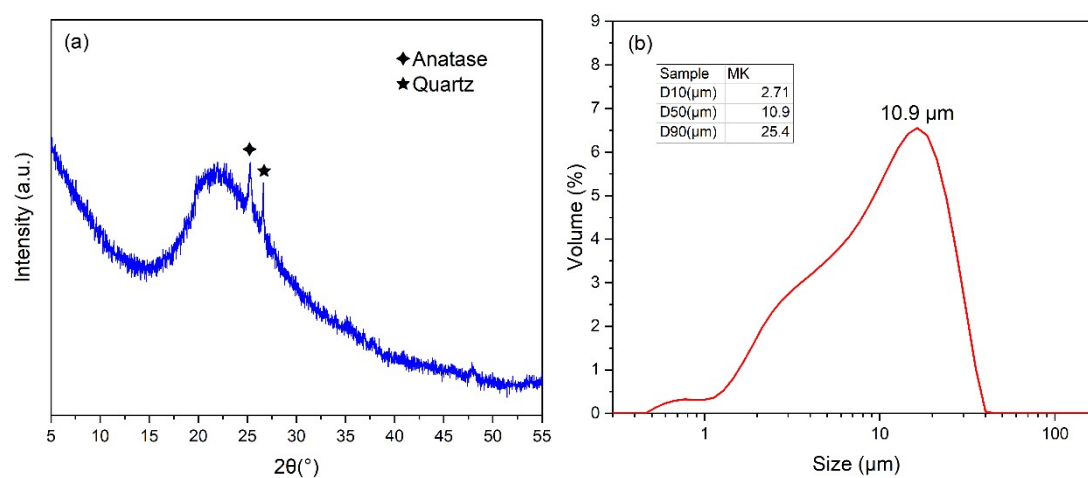

Figure S1 a) XRD diffractogram of unreacted MK precursor. b) Particle size distribution of MK determined by dynamic light scattering.

Table S2 Chemical composition of sodium silicate solution.

| Chemical        | Na <sub>2</sub> O/ wt.% | SiO <sub>2</sub> /wt.% | Water content / wt.% |
|-----------------|-------------------------|------------------------|----------------------|
| Sodium silicate | 12                      | 30                     | 58                   |

## Microbial corrosion setup

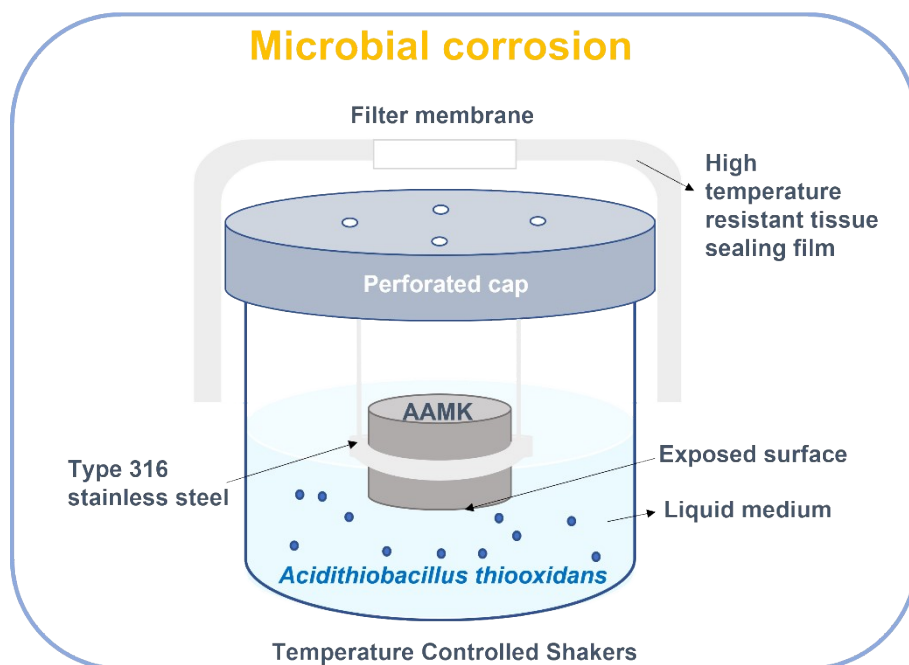

Figure S2 Setup of microbial corrosion test.

## SEM images for Fig. 1f in the manuscript

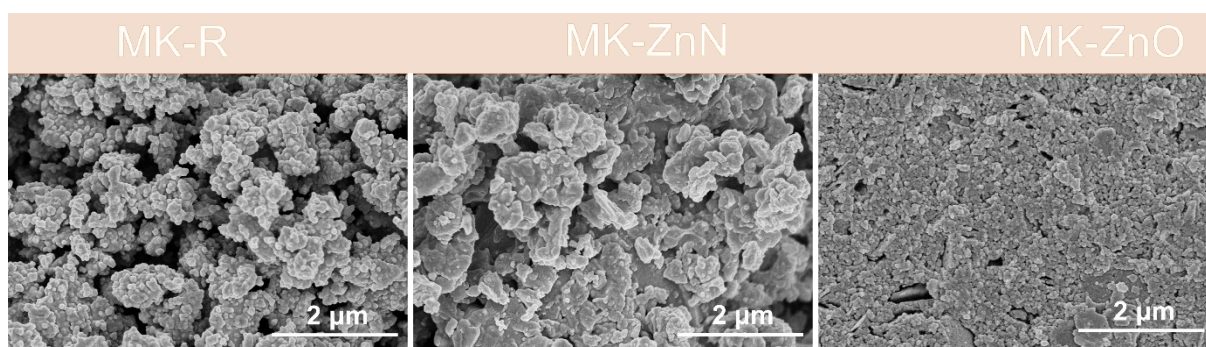

Figure S3 SEM images of Zn-doping AAMK geopolymers.

## NMR data

Tables S3-S5 are for Table 1 in manuscript.

Table S3 Parameter statistics of the deconvoluted  $^{29}\text{Si}$  MAS NMR spectra in R.

| R                    | Integral area               | Relative integral areas /% |
|----------------------|-----------------------------|----------------------------|
| Q <sup>4</sup> (4Al) | $(1.31\pm 0.21)\times 10^9$ | 10.6                       |
| Q <sup>4</sup> (3Al) | $(1.72\pm 1.00)\times 10^9$ | 14.0                       |
| Q <sup>4</sup> (2Al) | $(2.93\pm 1.50)\times 10^9$ | 23.8                       |
| Q <sup>4</sup> (1Al) | $(1.35\pm 0.82)\times 10^9$ | 11.0                       |
| Q <sup>4</sup> (0Al) | $(5.12\pm 0.15)\times 10^9$ | 40.5                       |

Table S4 Parameter statistics of the deconvoluted  $^{29}\text{Si}$  MAS NMR spectra in ZnN-AAMK.

| ZnN-AAMK             | Integral area               | Relative integral areas /% |
|----------------------|-----------------------------|----------------------------|
| Q <sup>4</sup> (4Al) | $(1.48\pm 1.17)\times 10^9$ | 12.5                       |
| Q <sup>4</sup> (3Al) | $(2.03\pm 4.10)\times 10^9$ | 17.4                       |
| Q <sup>4</sup> (2Al) | $(2.13\pm 5.02)\times 10^9$ | 18.3                       |
| Q <sup>4</sup> (1Al) | $(0.98\pm 2.00)\times 10^9$ | 8.4                        |
| Q <sup>4</sup> (0Al) | $(4.91\pm 0.26)\times 10^9$ | 43.5                       |

Table S5 Parameter statistics of the deconvoluted  $^{29}\text{Si}$  MAS NMR spectra in ZnO-AAMK.

| ZnO-AAMK             | Integral area               | Relative integral areas /% |
|----------------------|-----------------------------|----------------------------|
| Q <sup>4</sup> (4Al) | $(1.51\pm 0.22)\times 10^9$ | 25.7                       |
| Q <sup>4</sup> (3Al) | $(2.57\pm 0.68)\times 10^9$ | 42.3                       |
| Q <sup>4</sup> (2Al) | $(1.55\pm 0.80)\times 10^9$ | 25.7                       |
| Q <sup>4</sup> (1Al) | $(3.23\pm 3.71)\times 10^8$ | 5.4                        |
| Q <sup>4</sup> (0Al) | $(5.30\pm 4.20)\times 10^7$ | 0.9                        |

Table S6 The isotropic chemical shift and normalized relative integral areas for Q<sup>4</sup>(mAl)

environments within each sample extracted from the deconvoluted  $^{29}\text{Si}$  MAS NMR spectra.

The detailed data for Fig. 2f.

| Samples | Fractions of silicon present in different tetrahedral environments |                      |                      |                      |                      | Reaction degree /% | Bound water /% |
|---------|--------------------------------------------------------------------|----------------------|----------------------|----------------------|----------------------|--------------------|----------------|
|         | Q <sup>n</sup> (mAl)/%                                             | Q <sup>4</sup> (4Al) | Q <sup>4</sup> (3Al) | Q <sup>4</sup> (2Al) | Q <sup>4</sup> (1Al) |                    |                |
| 1       | 13.1                                                               | 15.2                 | 13.6                 | 8.8                  | 49.2                 | 50.8               | 11.0           |
| 2       | 14.4                                                               | 13.9                 | 12.0                 | 7.7                  | 52.0                 | 48.0               | 10.0           |
| 3       | 16.3                                                               | 18.1                 | 10.0                 | 8.2                  | 47.4                 | 52.6               | 10.5           |
| 4       | 14.4                                                               | 13.3                 | 15.0                 | 6.1                  | 51.2                 | 48.8               | 10.4           |
| 5       | 16.0                                                               | 12.1                 | 14.8                 | 7.4                  | 49.7                 | 50.4               | 10.3           |
| 6       | 10.6                                                               | 14.0                 | 23.8                 | 11.0                 | 40.5                 | 59.5               | 13.2           |
| 7       | 12.5                                                               | 17.4                 | 18.3                 | 8.4                  | 43.5                 | 56.5               | 12.1           |
| 8       | 16.0                                                               | 14.8                 | 17.4                 | 13.8                 | 38.0                 | 62.0               | 11.9           |
| 9       | 25.8                                                               | 42.3                 | 25.7                 | 5.4                  | 0.9                  | 99.1               | 18.8           |
| 10      | 28.6                                                               | 42.1                 | 17.1                 | 9.7                  | 2.5                  | 97.5               | 19.1           |

## XAFS data

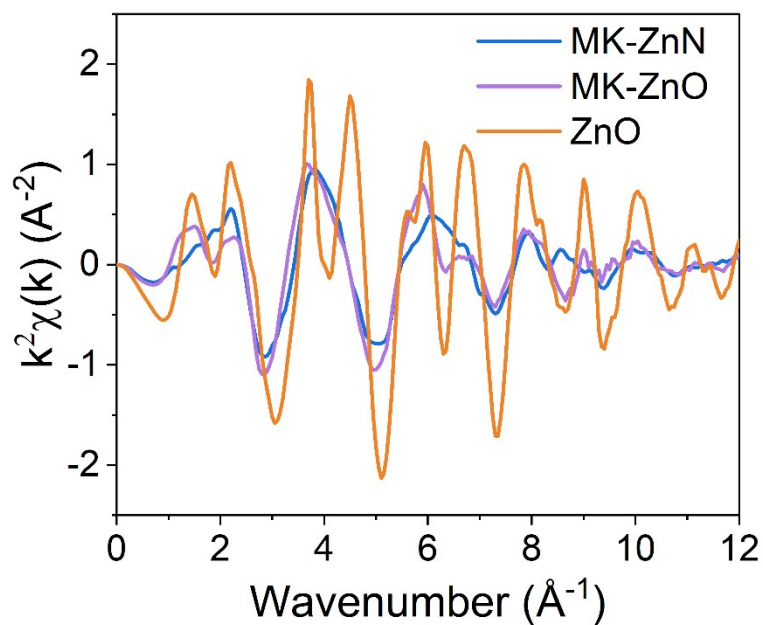

Figure S4  $k^3$ -weighted Zn K-edge EXAFS spectra ( $\chi$  function) of Zn-doping AAMK.

Fig. S4 displays  $k^3$ -weighted EXAFS spectra and. The ZnO crystal spectrum show stronger sinusoidal oscillation comparing with Zn-containing AAMK spectra, resulting from highly ordering of Zn environment in crystal.

## Antibacterial properties and phase evaluation of MK-based geopolymer after microbial corrosion (MC)

Table S7 The isotropic chemical shift and normalised relative integral areas for Q<sup>n</sup>(mAl) environments within each sample extracted from the deconvoluted <sup>29</sup>Si MAS NMR spectra.

The detailed data for Fig. 5b and 5d.

| Q <sup>n</sup> (mAl)/% | Fractions of silicon present in different tetrahedral environments |                      |                      |                      |                      | Si/Al ratio | Increase percentage |
|------------------------|--------------------------------------------------------------------|----------------------|----------------------|----------------------|----------------------|-------------|---------------------|
|                        | Q <sup>4</sup> (4Al)                                               | Q <sup>4</sup> (3Al) | Q <sup>4</sup> (2Al) | Q <sup>4</sup> (1Al) | Q <sup>4</sup> (0Al) |             |                     |
| Chemical shift /ppm    | -84.9                                                              | -90.8                | -95.5                | -100.6               | -108.1               | -           | -                   |
| R-non-MC               | 10.6                                                               | 14.0                 | 23.8                 | 11.0                 | 40.5                 | 1.7         | -                   |
| R-MC                   | 3.9                                                                | 18.3                 | 26.1                 | 24.2                 | 27.6                 | 2.0         | 17.6%               |
| MK-ZnO-non-MC          | 25.8                                                               | 42.3                 | 25.7                 | 5.4                  | 0.9                  | 1.4         | -                   |
| MK-ZnO-MC              | 23.6                                                               | 38.9                 | 20.8                 | 13.1                 | 3.6                  | 1.5         | 7.1%                |

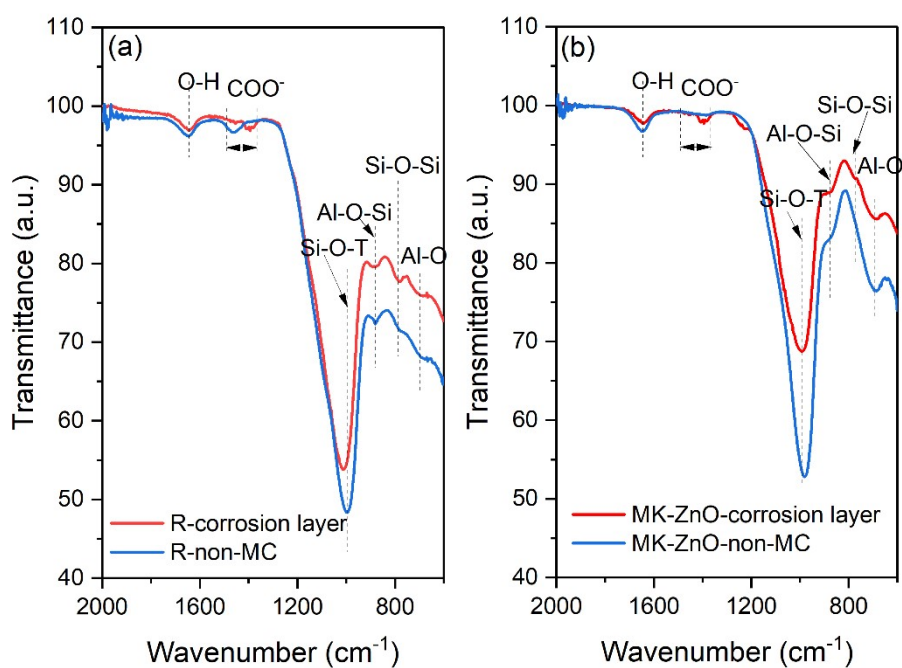

Figure S5 FTIR results of corrosion layer and non-MC samples of a) R and b) ZnO-AAMK.

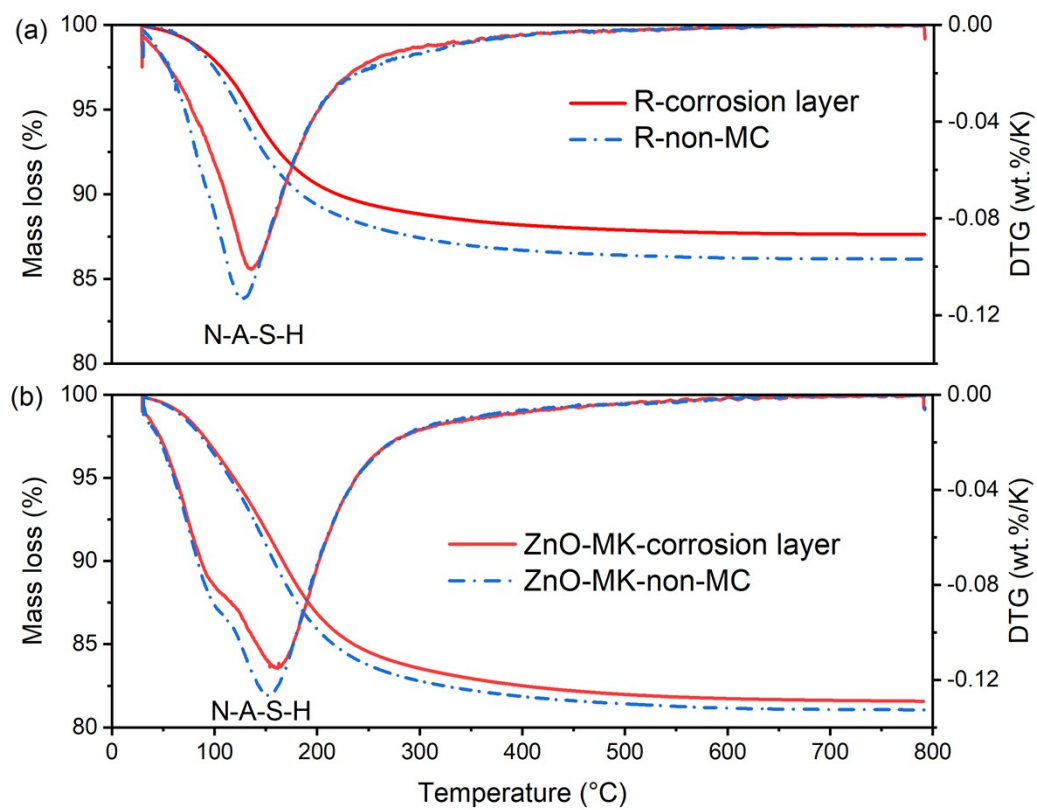

Figure S6 TGA results of corrosion layer and non-MC samples of a) R and b) ZnO-AAMK.



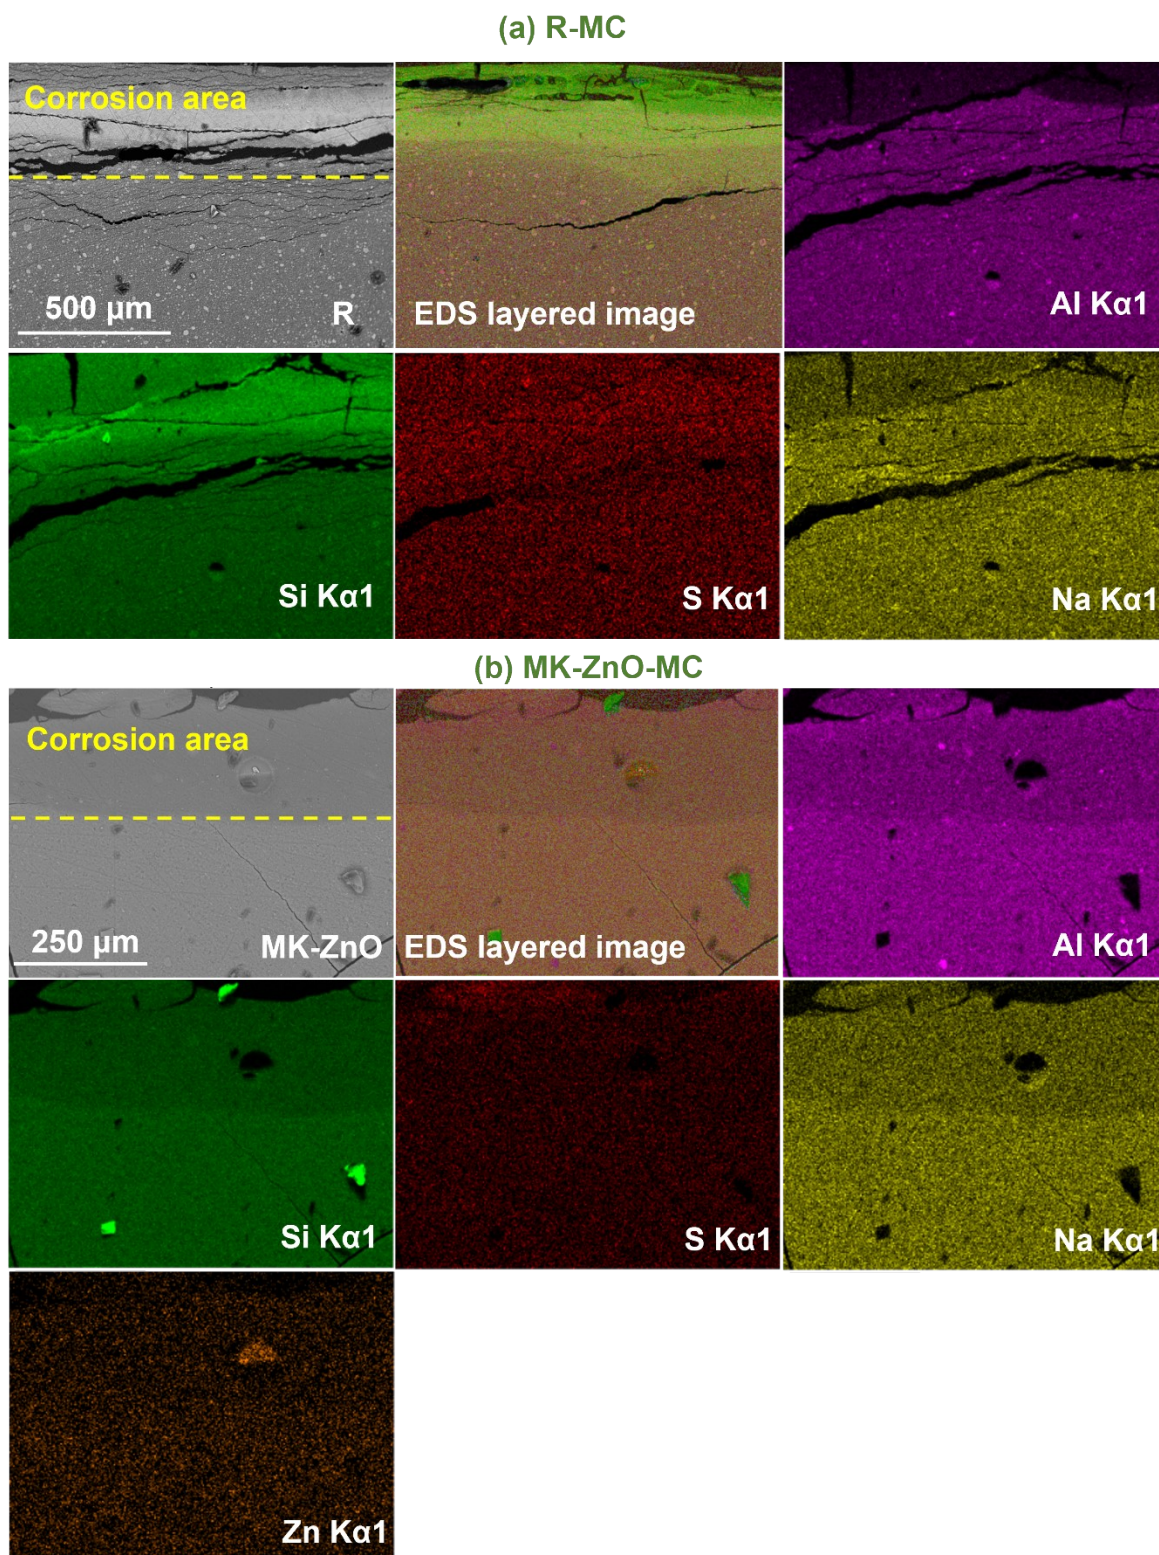

Figure S7 Results of SEM-EDS mapping of neat AAMK and ZnO-modified AAMK after 24-d microbial corrosion.
